# Supplementary material
Source: Springer Nature journal article supplement (doi:10.1186/1860-5397-16-8)

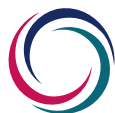

## Supporting Information

for

### Photocontrolled DNA minor groove interactions of imidazole/ pyrrole polyamides

Sabrina Müller, Jannik Paulus, Jochen Mattay, Heiko Ihmels, Veronica I. Dodero  
and Norbert Sewald

*Beilstein J. Org. Chem.* **2020**, *16*, 60–70. doi:10.3762/bjoc.16.8

### NMR spectra of P1–P3 and dimers 6 and 7

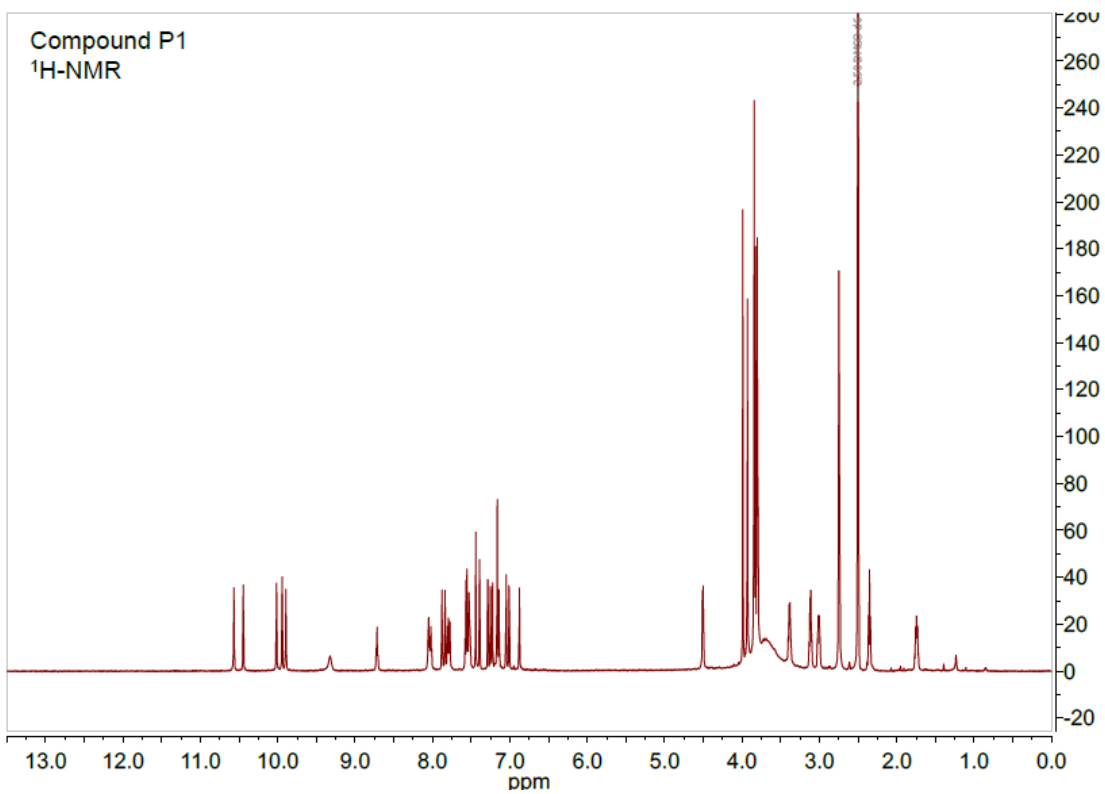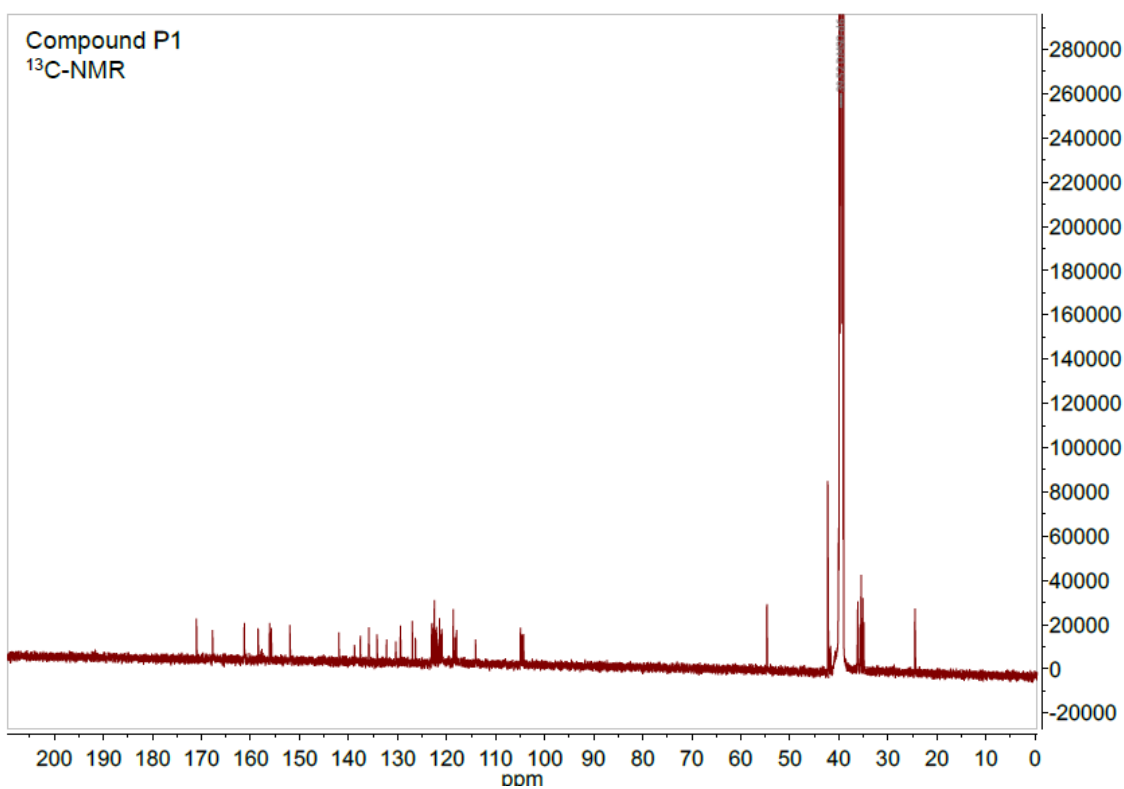

Compound P1  
(<sup>1</sup>H, <sup>13</sup>C)-HMBC

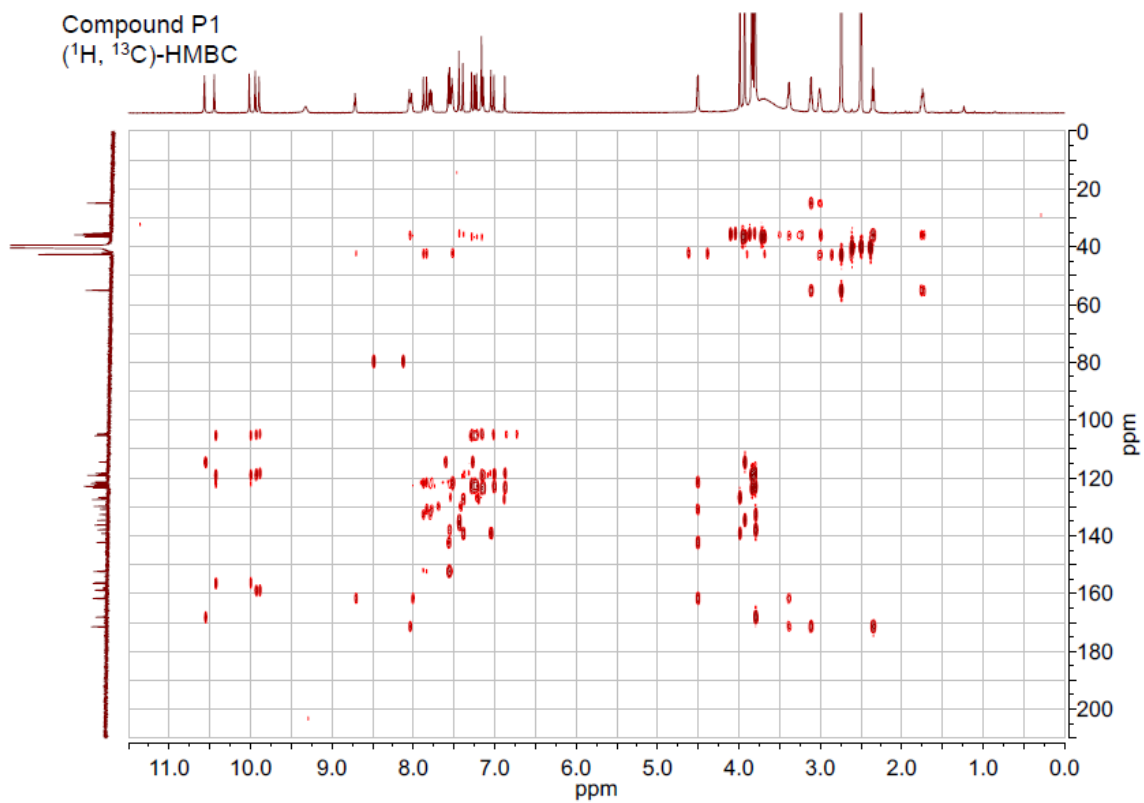

Compound P1  
(<sup>1</sup>H, <sup>13</sup>C)-HMQC

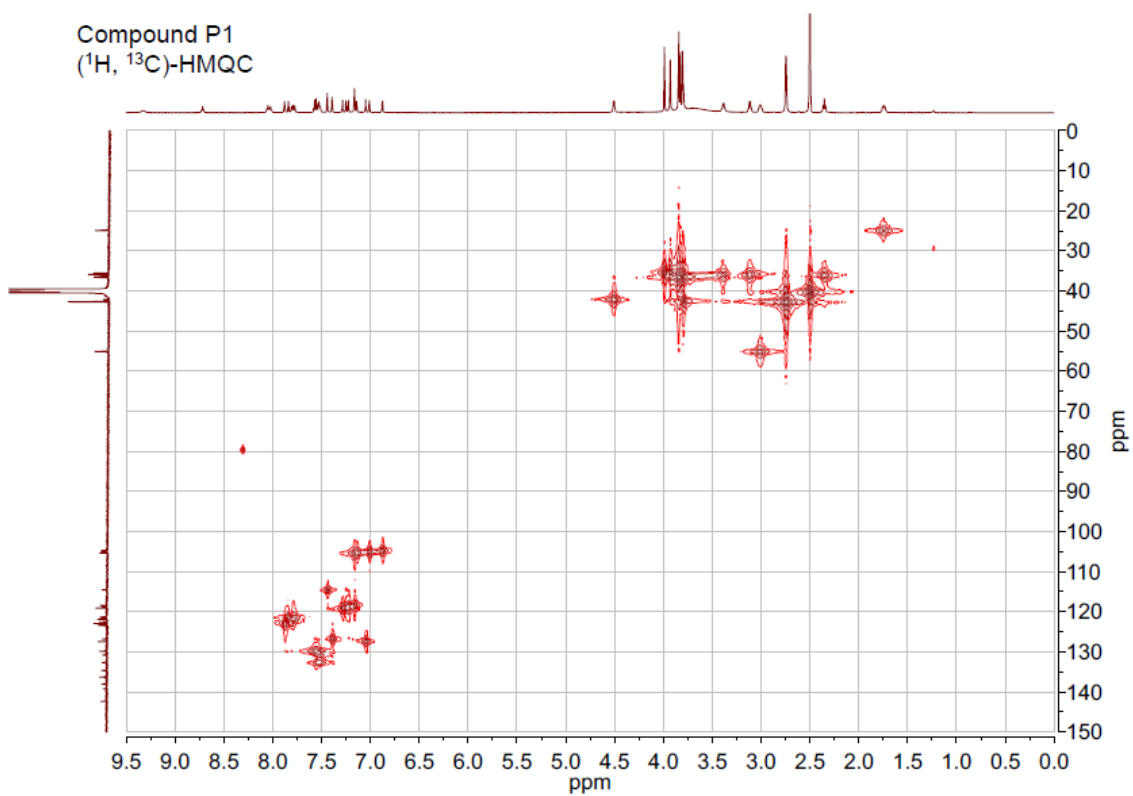

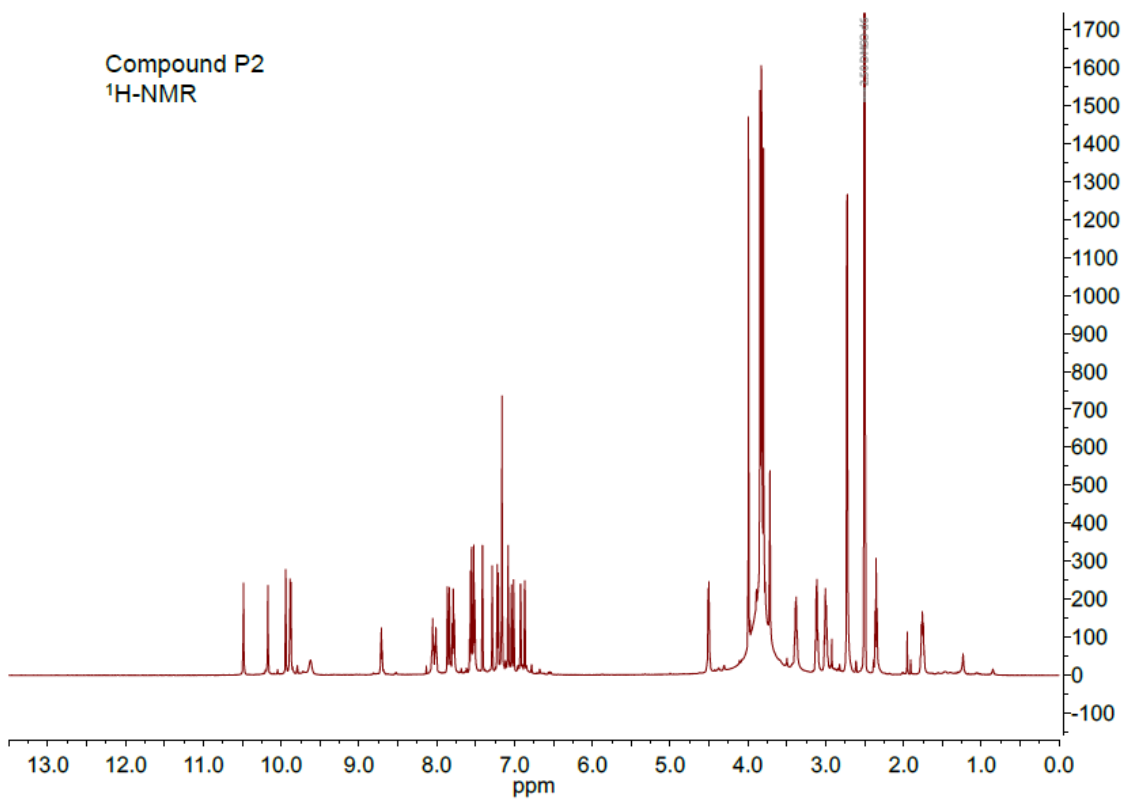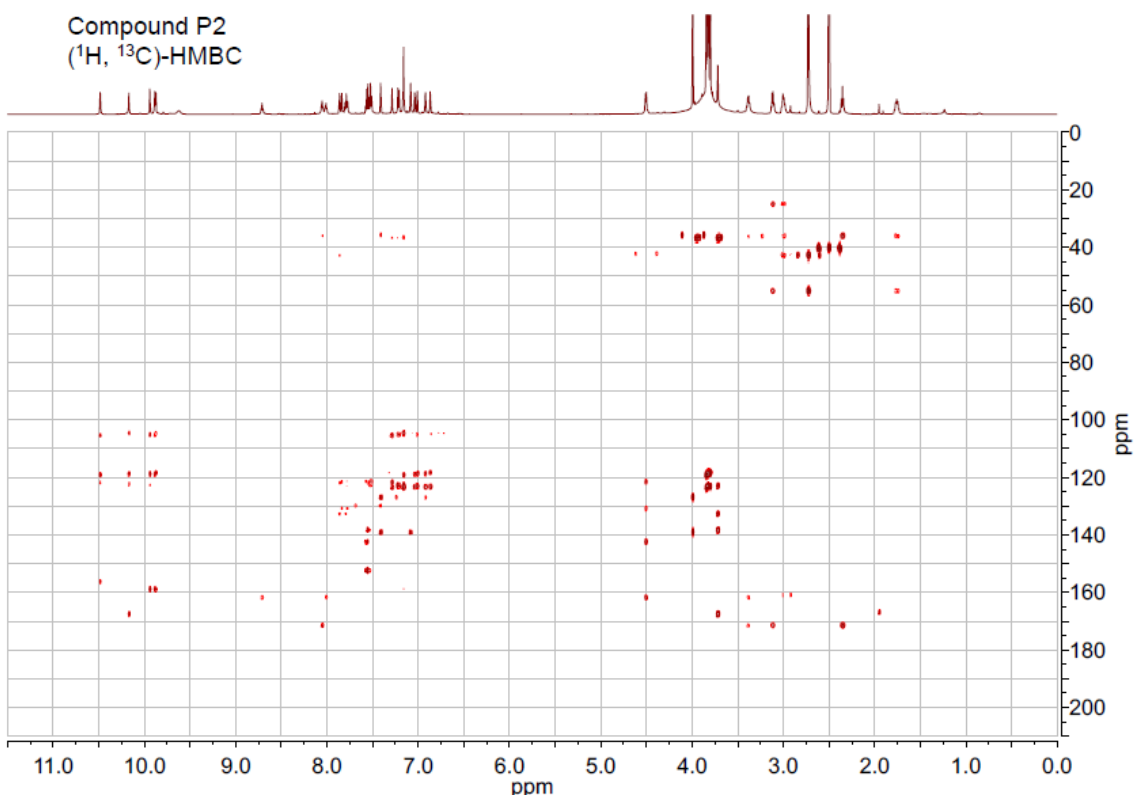

Compound P2  
(<sup>1</sup>H, <sup>13</sup>C)-HMQC

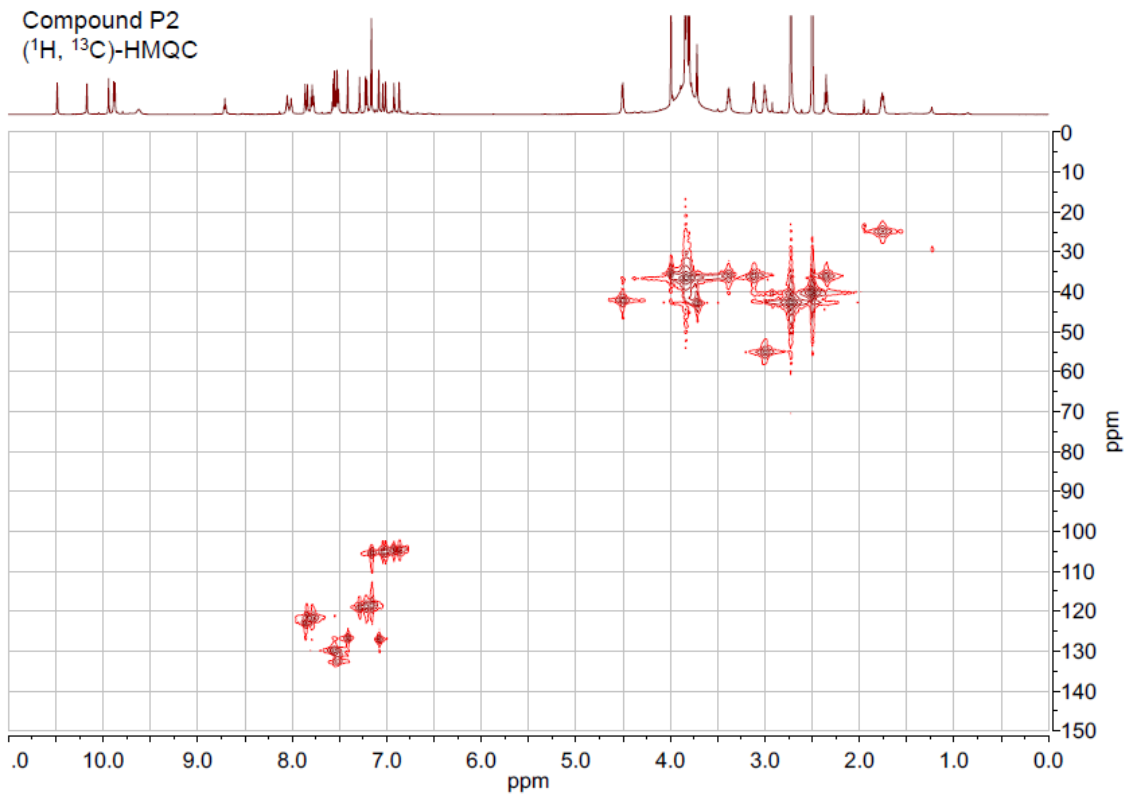

Compound P3  
<sup>1</sup>H-NMR

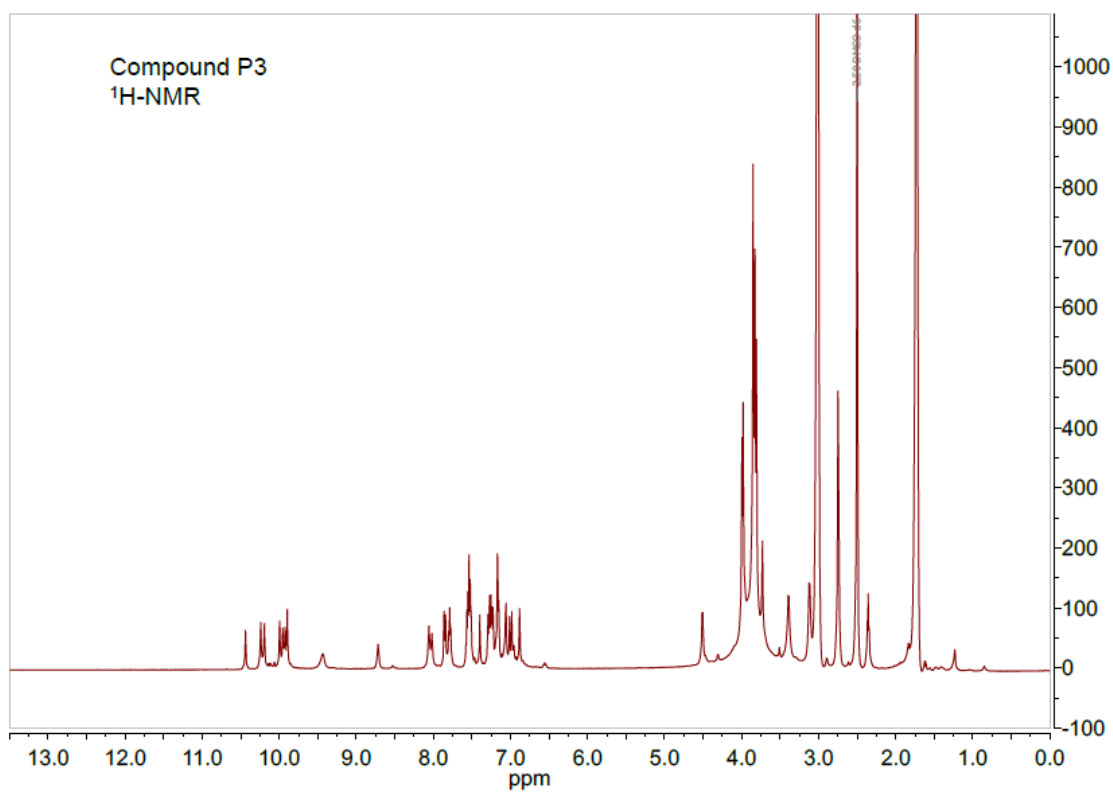

Compound P3  
(<sup>1</sup>H, <sup>13</sup>C)-HMQC

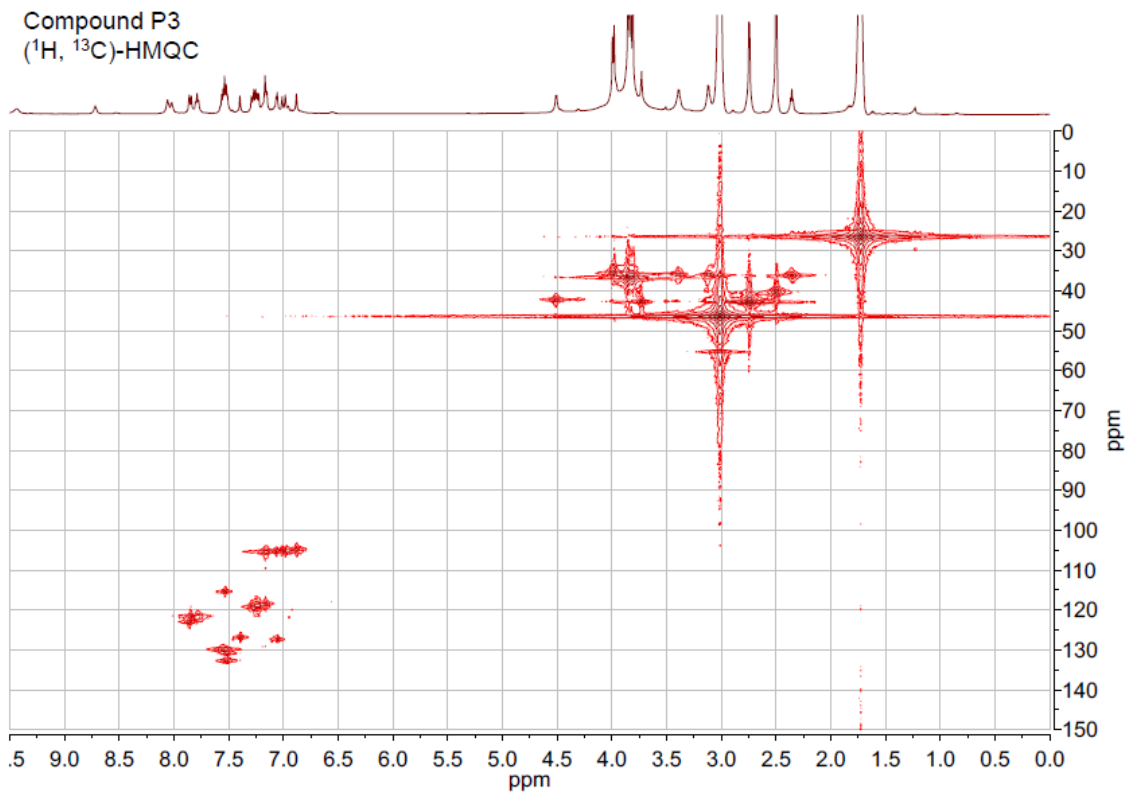

Compound P3  
(<sup>1</sup>H, <sup>13</sup>C)-HMBC

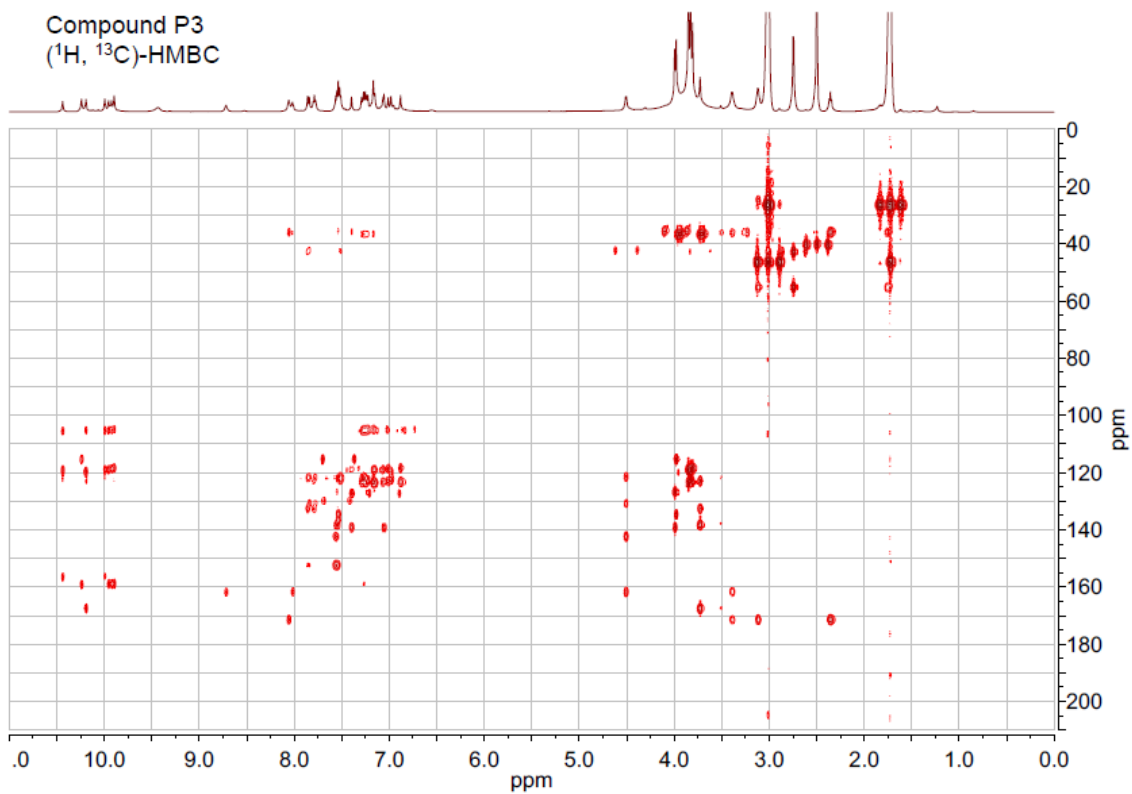

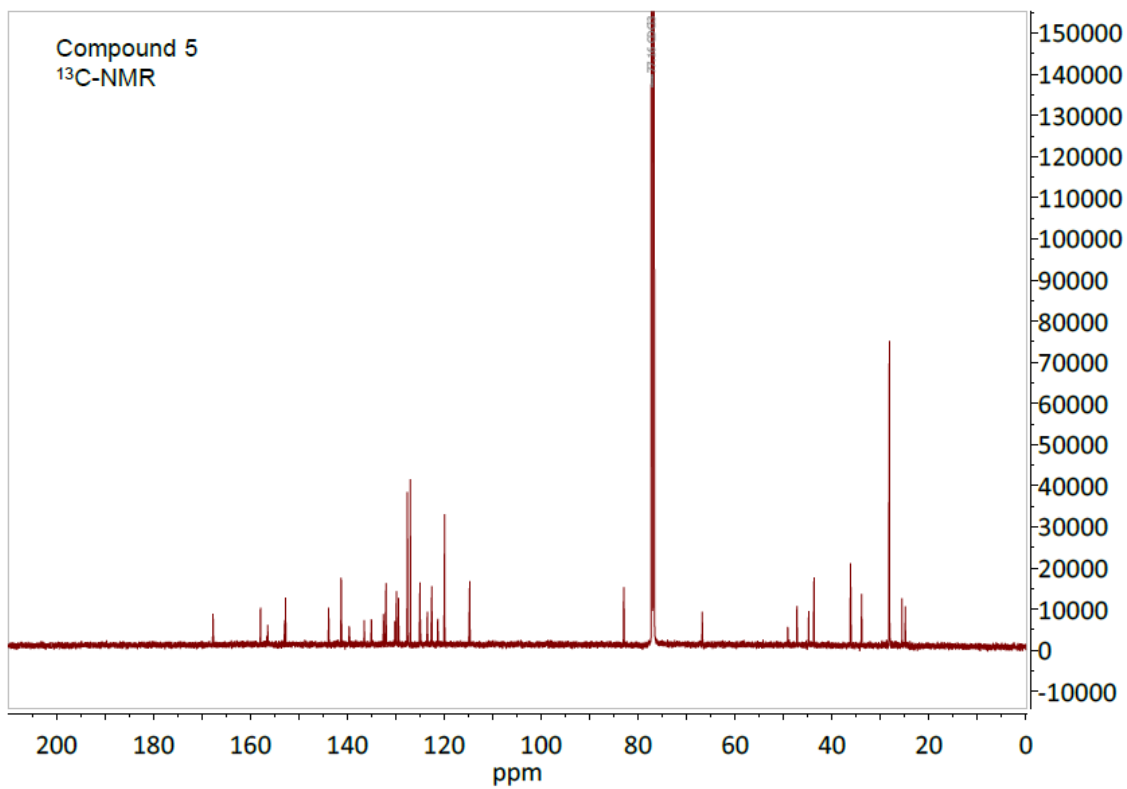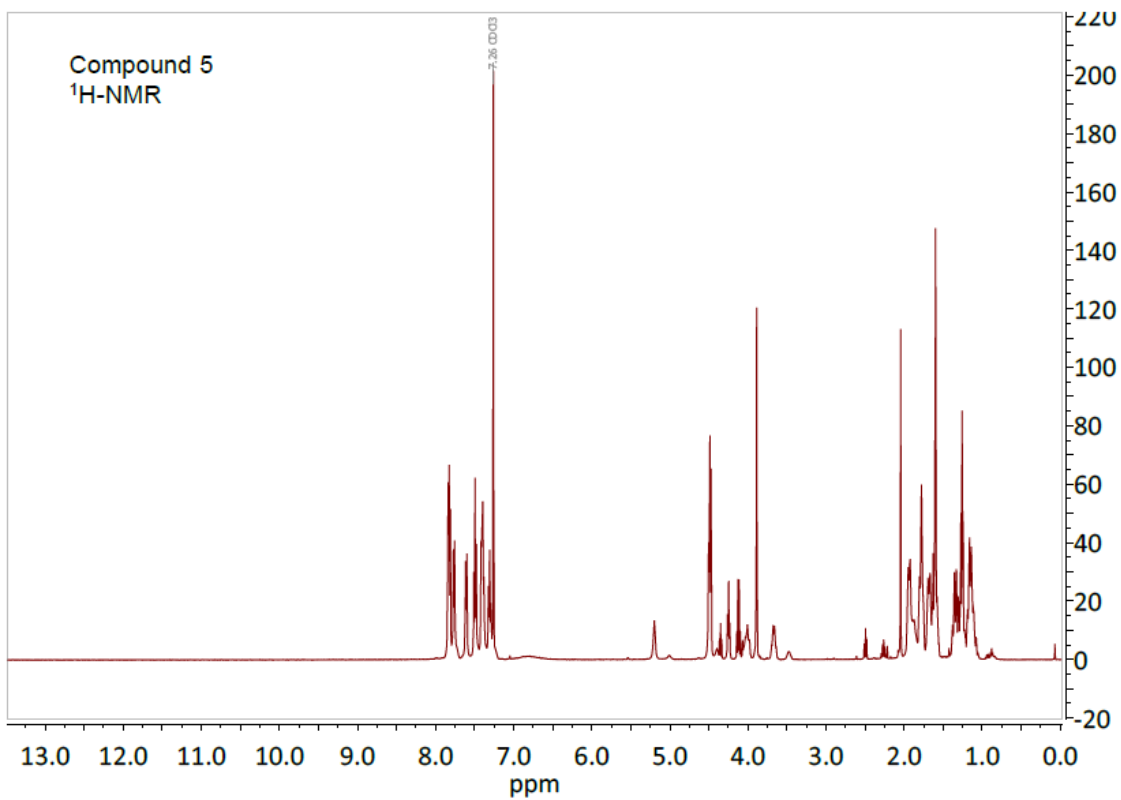

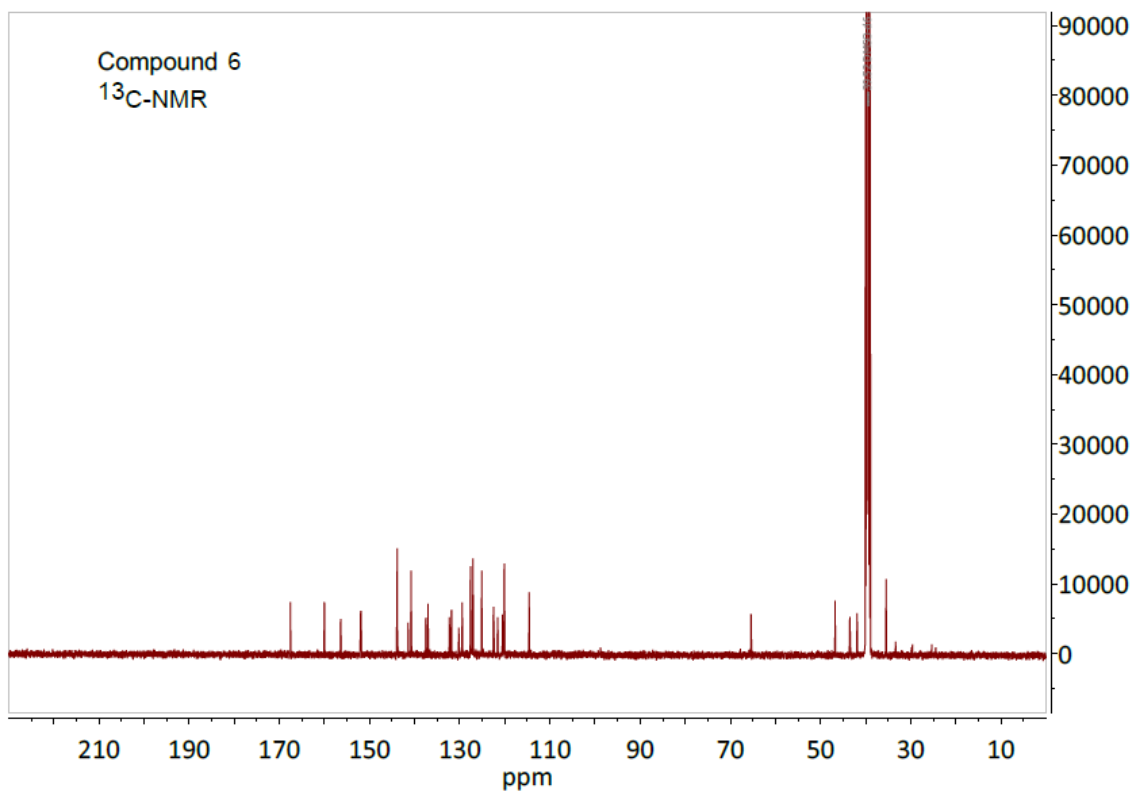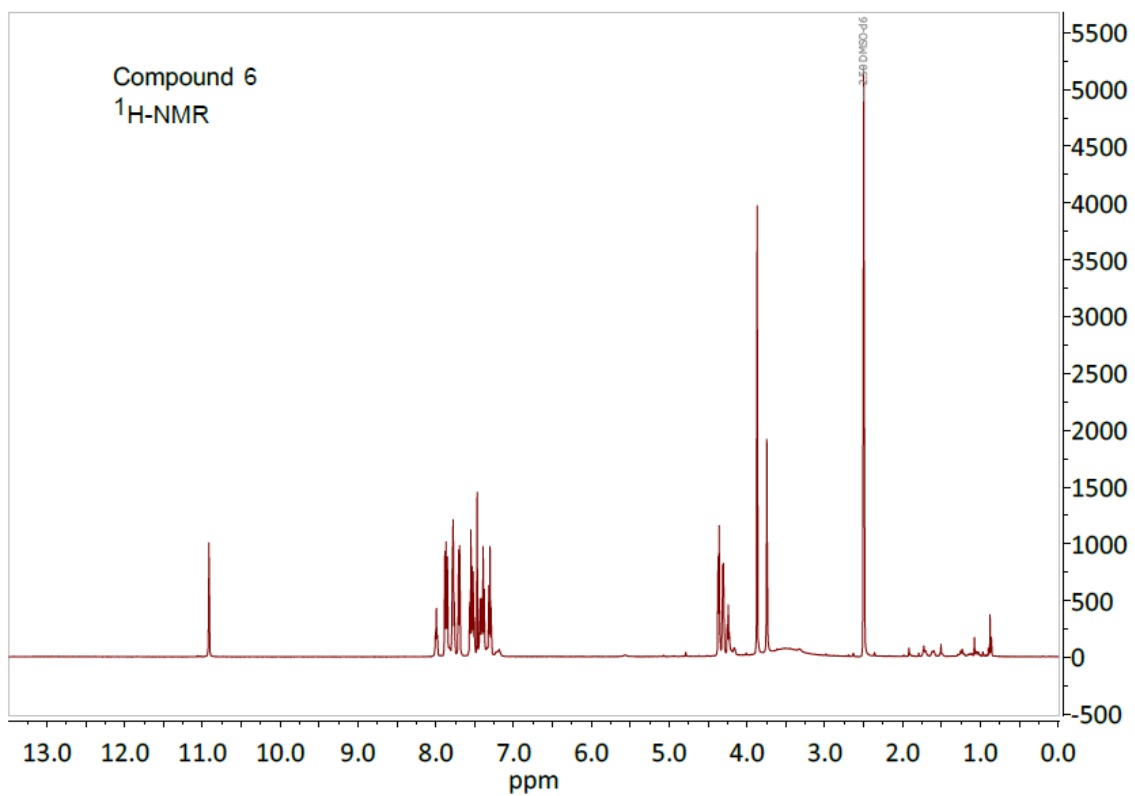

Supplement: Additional file 2 [file 1860-5397-16-8-S2.pdf]
